# Supplementary material for: Systematic analysis of expression profiles and prognostic significance for MMDS-related iron–sulfur proteins in renal clear cell carcinoma
Source: Sci Rep. 2022 Nov 16;12:19637. doi: 10.1038/s41598-022-22479-4 (PMC9669015; doi:10.1038/s41598-022-22479-4)
Supplement: Supplementary file 2 — Supplementary Table 1. [file 41598_2022_22479_MOESM2_ESM.xlsx]

## Sheet: Sheet1
Symbol
COPS4
IBA57
CHMP5
ADH5
MRPL49
TSG101
SDHD
KLHL9
THTPA
JKAMP
OCIAD1
SETD3
HELQ
UBE2D3
FBXO3
C2orf47
ISCA1
PPP6C
SPTLC1
C9orf156
CGRRF1
FBXO8
MRPL50
HDHD2
RCHY1
PEX19
GALK2
FBXO7
INIP
KLHDC2
SLC39A9
MOAP1
HNRNPK
SMU1
SUCLA2
TIMM21
MPP5
C1D
MRFAP1
WDR20
PIGH
KBTBD4
ACAA2
MUT
VWA9
CSTF1
YWHAE
MRPL46
SNAPC3
MMADHC
DDX1
FASTKD2
CLN5
METTL14
ORC4
CCNDBP1
MRPL44
DCAF11
PRPSAP2
MUL1
CTR9
ANKRD46
RAB14
GABARAPL2
ZNF181
SKP1
POLR2C
FBXL5
HADHB
OSBPL1A
RDH14
MRPS14
UFSP2
RBM18
SIRT5
GNE
VAPA
ALG2
ATP5F1
ETFA
TMEM59
RNF20
TSPYL1
SRSF8
TBC1D19
HNRNPH2
TRUB2
TOM1L1
BCAS2
PPM1A
MFAP1
DCTN3
SMIM7
NUBPL
CD46
WDR61
GNB5
SENP8
TOPORS
ALDH9A1
